# Supplementary material for: PGC-1α4 Interacts with REST to Upregulate Neuronal Genes and Augment Energy Consumption in Developing Cardiomyocytes
Source: MDPI journal article supplement (doi:10.3390/cells11192944), 2022-09-20
Supplement: s1 [file s1]

# **PGC-1 $\alpha$ 4 interacts with REST to upregulate neuronal genes and augment energy consumption in developing cardiomyocytes**

**Tomi Tuomainen <sup>1</sup>, Nikolay Naumenko <sup>1</sup>, Maija Mutikainen <sup>1</sup>, Anastasia Shakirzyanova <sup>1</sup>, Sarah Sczelecki <sup>2</sup>, Jennifer L. Estall <sup>2</sup>, Jorge L. Ruas <sup>3</sup>, Pasi Tavi <sup>1,\*</sup>**

<sup>1</sup> A.I. Virtanen Institute for Molecular Sciences, University of Eastern Finland, 70210 Kuopio, Finland

<sup>2</sup> Institut de Recherches Cliniques de Montréal, Montréal, QC H2W 1R7, Canada

<sup>3</sup> Molecular and Cellular Exercise Physiology, Department of Physiology and Pharmacology, Biomedicum, Karolinska Institutet, 17165 Stockholm, Sweden

\* Correspondence: pasi.tavi@uef.fi

## Supplementary figures

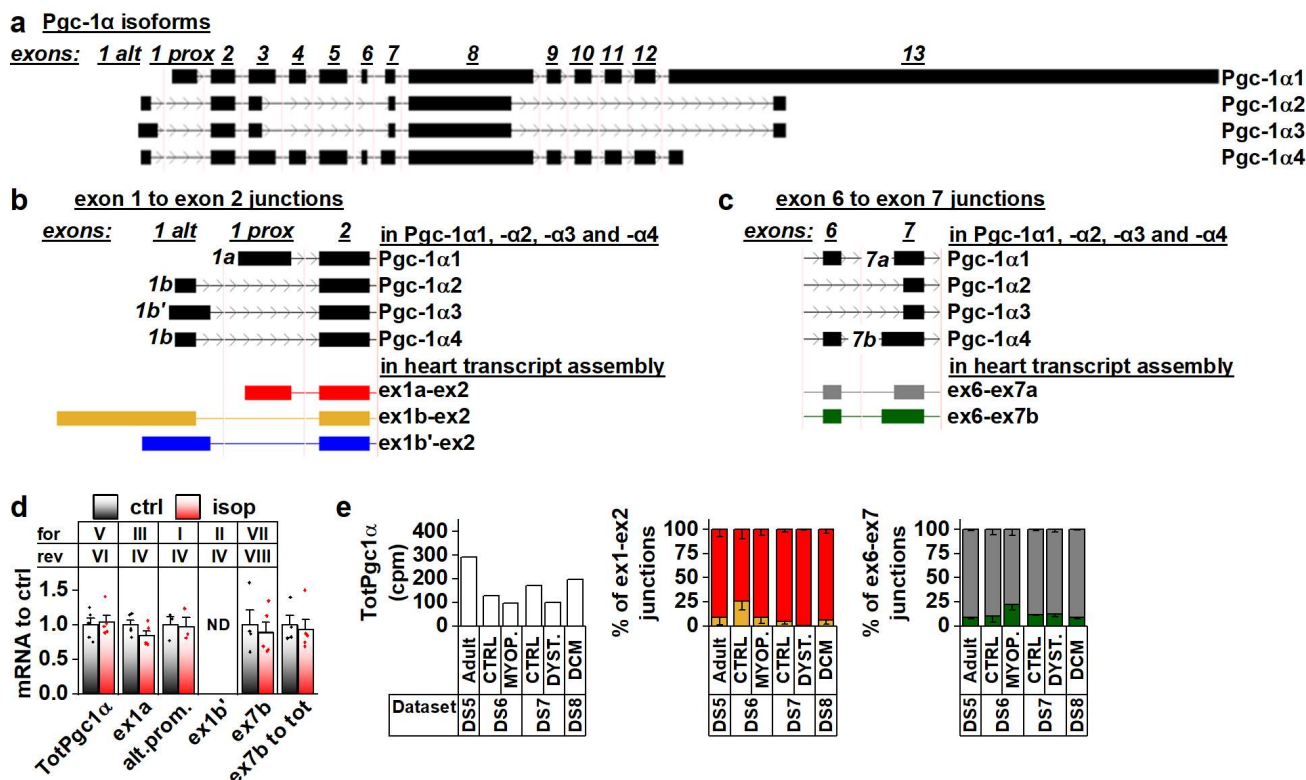

**Figure S1. Splicing and promoter usage of *Pgc-1 $\alpha$*  gene in the mouse heart.** (a) Exon structures of previously reported mouse *Pgc-1 $\alpha$*  isoforms. Sequences for *Pgc-1 $\alpha$ 1*, *Pgc-1 $\alpha$ 2*, *Pgc-1 $\alpha$ 3* and *Pgc-1 $\alpha$ 4* were acquired from the GenBank database (accession id's NM\_008904, JX866946, JX866947 and JX866948, respectively). (b) Enlarged view of *Pgc-1 $\alpha$*  exon structures showing the junctions between exons 1 and 2. Structures colored red, yellow and blue show exon 1 to exon 2 junctions that were present in transcript assemblies from mouse heart RNA sequencing datasets. (c) Enlarged view of *Pgc-1 $\alpha$*  exon structures showing the junctions between exons 6 and 7. Structures colored grey and green show exon 6 to exon 7 junctions that were present in transcript assemblies from mouse heart RNA sequencing datasets. (d) *Pgc-1 $\alpha$*  expression analysis with qRT-PCR from isoprenaline-exposed E12.5 mouse cardiomyocytes (n=6). See Figure 1A for PCR primers (for/rev) used to detect expression of specific exons. (e) Total *Pgc-1 $\alpha$*  expression (top), ratios of reads aligning to exon 1-exon 2 junctions (middle) and ratios of reads aligning to exon 6-exon 7 junctions (bottom) assessed from publicly available RNA sequencing datasets from human hearts.

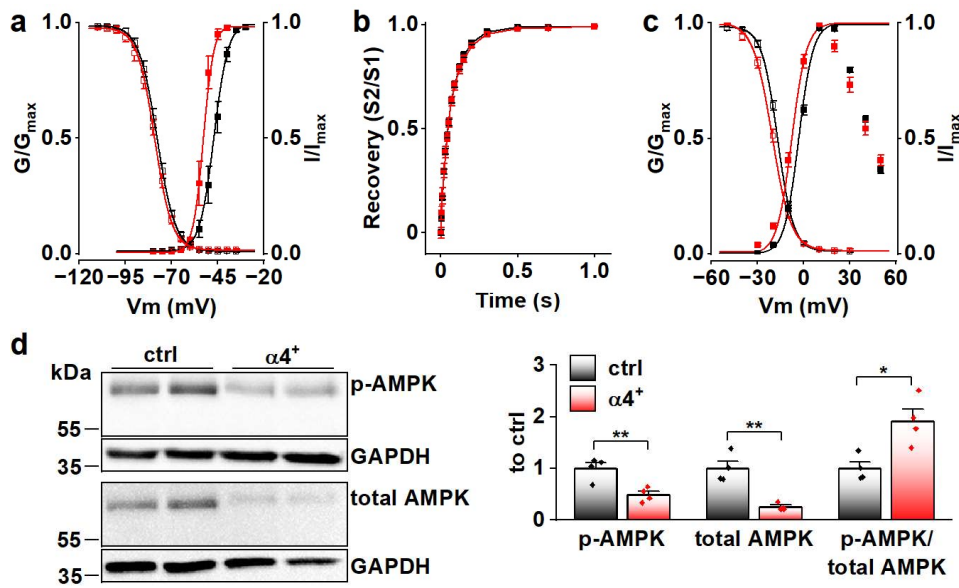

**Figure S2. Sodium and L-type calcium current kinetics in 4-week-old  $\alpha 4^+$  cardiomyocytes.** (a) Voltage dependent activation (closed squares) and inactivation (open squares) of sodium current (Boltzmann fitting, see the fitting result in Supplementary Table S2) ( $n[\text{ctrl}]=13$ ,  $n[\alpha 4^+]=12$ ). (b) Time dependent recovery of sodium current ( $n[\text{ctrl}]=13$ ,  $n[\alpha 4^+]=12$ ). (c) Voltage-dependent activation (closed squares) and inactivation (open squares) of L-type calcium current (Boltzmann fitting, see the fitting result in Supplementary Table S2) ( $n[\text{ctrl}]=30$ ,  $n[\alpha 4^+]=36$ ). (d) Representative western blots showing expression of phosphorylated AMP kinase (Thr172, p-AMPK) and total AMPK expression in ventricles of 4-week-old animals (left), and quantification of expression (right,  $n=4$ ). Student's t-test p-value: \*,  $p<0.05$ ; \*\*,  $p<0.01$ .

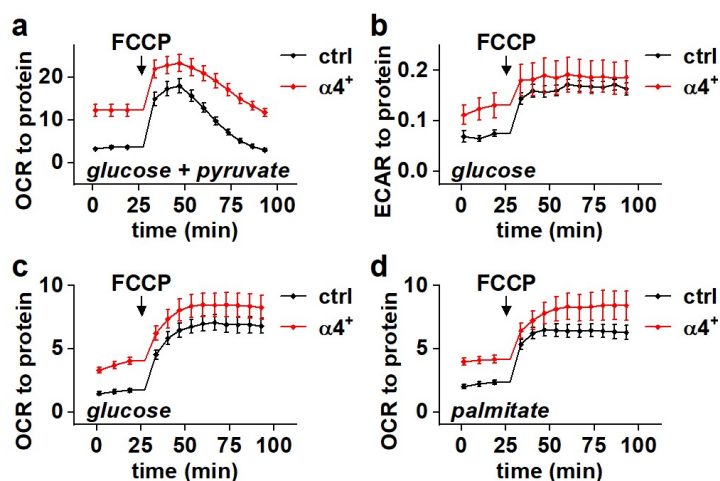

**Figure S3. Averaged traces from Seahorse extracellular flux assays.** (a) Oxygen consumption rate (OCR) in isolated 4-week-old cardiomyocytes supplemented with glucose and pyruvate ( $n[\text{ctrl}]=5/33$  (animals/wells),  $n[\alpha 4^+]=5/38$ ). (b) Extracellular acidification rate (ECAR) in isolated 4-week-old cardiomyocytes supplemented with glucose ( $n[\text{ctrl}]=5/17$ ,  $n[\alpha 4^+]=6/15$ ). (c) OCR in isolated 4-week-old cardiomyocytes supplemented with glucose ( $n[\text{ctrl}]=5/25$ ,  $n[\alpha 4^+]=6/24$ ). (d) OCR in isolated 4-week-old cardiomyocytes supplemented with palmitate ( $n[\text{ctrl}]=5/23$ ,  $n[\alpha 4^+]=6/20$ ).

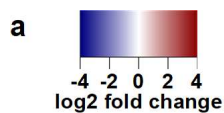

voltage gated  
sodium channels

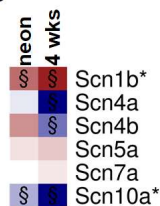

potassium channels

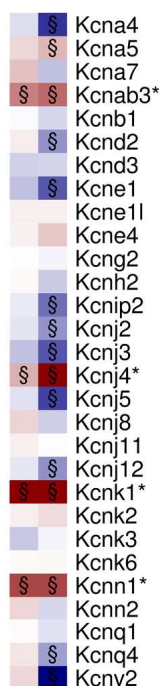

voltage gated  
calcium channels

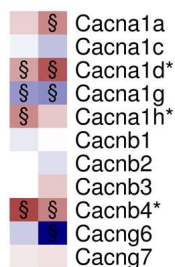

plasmalemmal  
calcium ATPase and  
Na/Ca exchanger

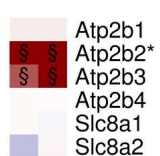

sodium-potassium  
ATPase

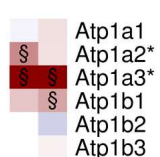

other genes in the  
enriched ion  
transport pathway

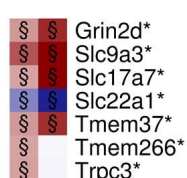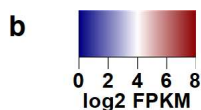

voltage gated  
sodium channels

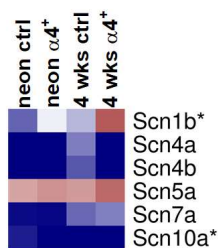

potassium channels

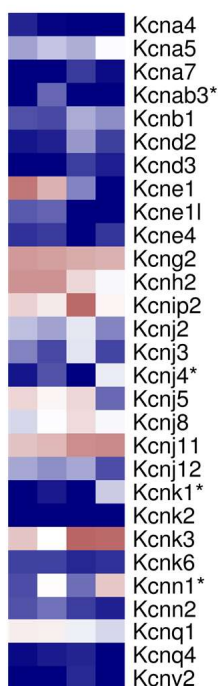

voltage gated  
calcium channels

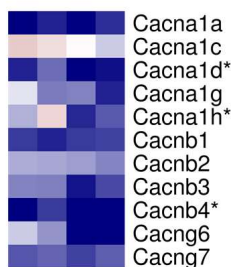

plasmalemmal  
calcium ATPase and  
Na/Ca exchanger

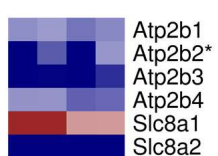

sodium-potassium  
ATPase

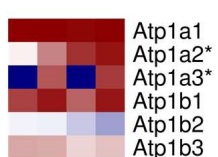

other genes in the  
enriched ion  
transport pathway

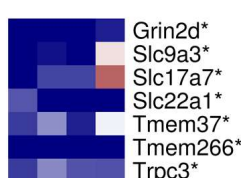

**Figure S4. Gene expression of cell membrane ion transporters in neonatal and 4-week-old  $\alpha 4^+$  ventricles.**

**(a)** Heatmap showing transcriptional changes of genes encoding for plasmalemmal ion transporters in  $\alpha 4^+$  ventricles assessed with RNA sequencing. **(b)** Heatmap showing mean FPKM values for experimental groups. §,  $p < 0.01$  and absolute  $\log_2$  fold change  $> 1$ . Asterisk in the gene id marks the genes that were changed in neonatal ventricles belonging to ion transporter pathway (GO biological process).

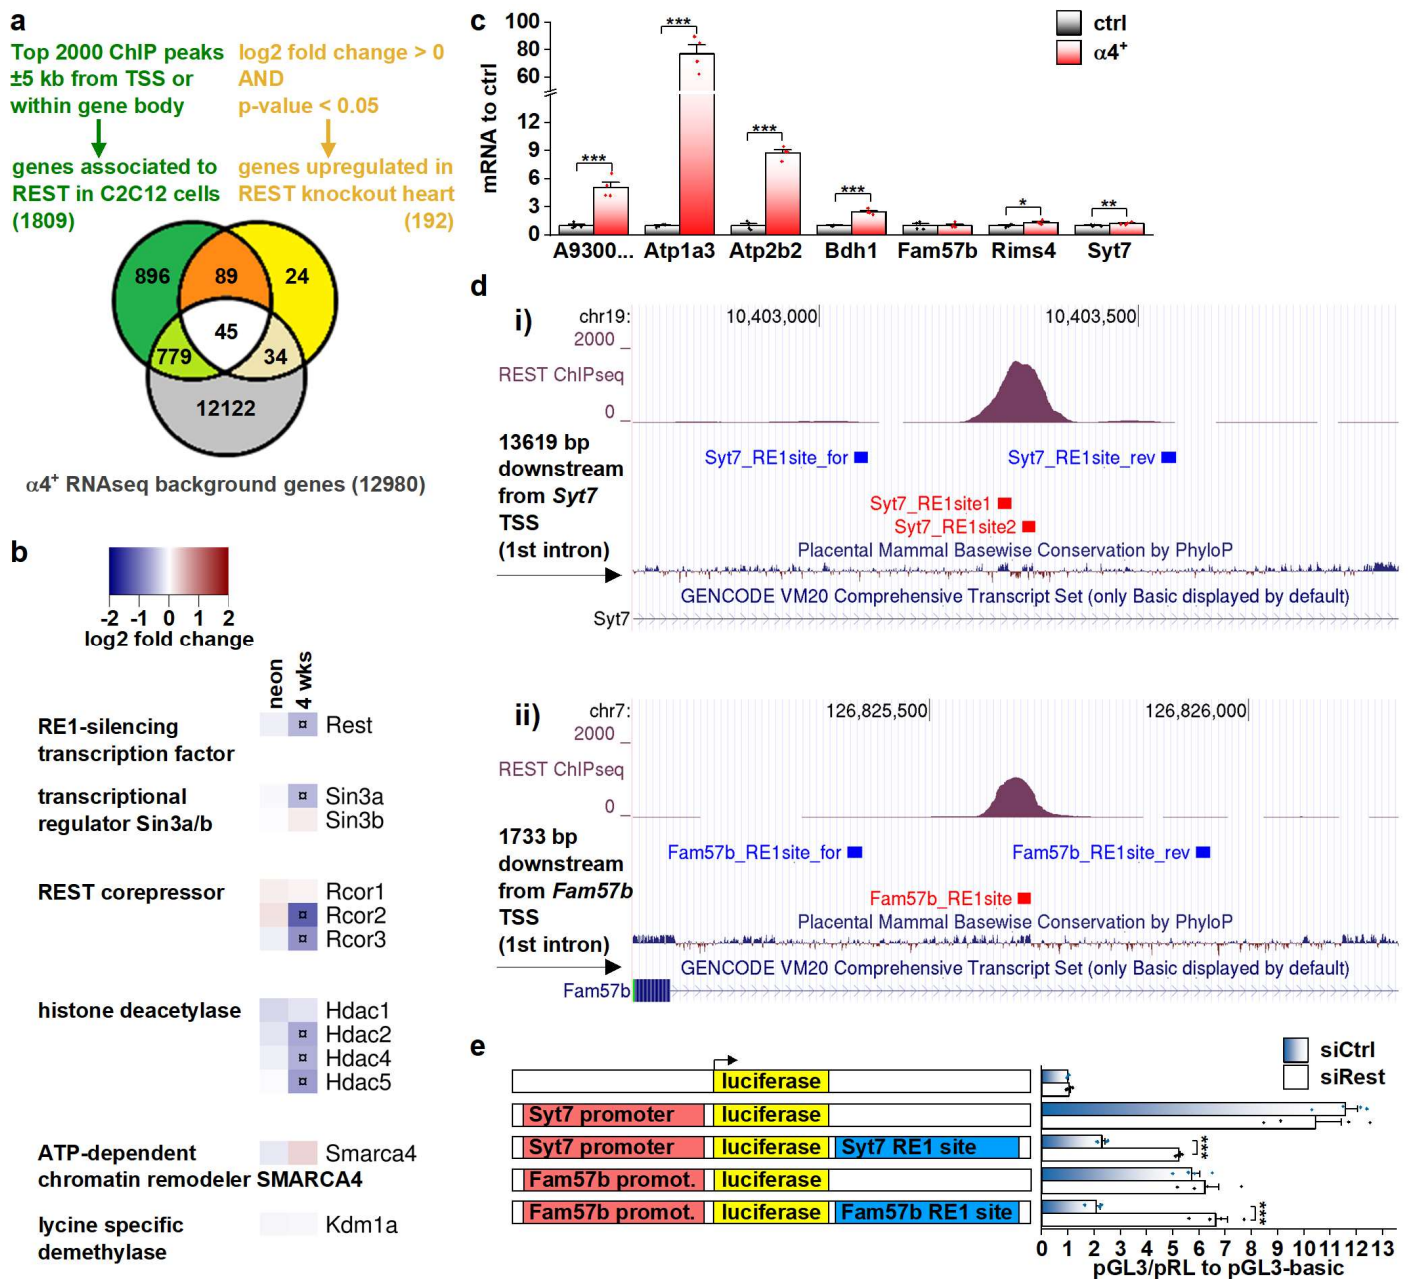

**Figure S5. Genes associated with the transcriptional repressor REST are induced by PGC-1 $\alpha 4$  in cardiac myocytes.** (a) Venn diagram showing the overlap of genes upregulated in REST knockout mouse heart, associated with the REST ChIP sequencing peak in C2C12 cells and passing the expression filter in  $\alpha 4^+$  RNA sequencing data. (b) Heatmap showing the expression of *Rest* and other REST complex members in  $\alpha 4^+$  ventricles assessed from RNA sequencing data. (c) Gene expression of Rest target genes in embryonic day 12.5  $\alpha 4^+$  ventricles (n=4). (d) Genome tracks (UCSC mm10 browser) from the DNA region surrounding RE1 sites showing ChIP sequencing peaks from C2C12 data, binding sites of primers used for cloning the RE1 site region to luciferase expression plasmid (blue), RE1 consensus sites below ChIP-seq peaks (red) and DNA conservation track from UCSC browser. i) *Syt7* RE1 site, ii) *Fam57b* RE1 site. (e) Effect of Rest siRNA co-transfection on the activity of luciferase constructs containing the RE1 site in HL-1 cells (n=4). Student's t-test p-value: \*, p<0.05; \*\*, p<0.01; \*\*\*, p<0.001. Heatmap:  $\alpha$ , p<0.01.



## Supplementary tables

**Table S1. NCBI BioProject identifiers and sample descriptions for RNA sequencing datasets used in Pgc-1 $\alpha$  expression analysis.**

| <b>Dataset</b> | <b>BioProject</b> | <b>Sample description and DOI for publication</b>                                                                                                                                                                                                                             |
|----------------|-------------------|-------------------------------------------------------------------------------------------------------------------------------------------------------------------------------------------------------------------------------------------------------------------------------|
| DS1            | PRJNA 227375      | 14 weeks old mouse heart 14 days after LAD and SHAM operation (n=4)<br><a href="https://doi.org/10.1093/eurheartj/ehu180">https://doi.org/10.1093/eurheartj/ehu180</a>                                                                                                        |
| DS2            | PRJNA 472253      | 8 weeks old mouse left ventricles 1 day, 1 week and 8 weeks after LAD and SHAM operation (n=3)<br><a href="https://doi.org/10.1038/s41419-019-2061-8">https://doi.org/10.1038/s41419-019-2061-8</a>                                                                           |
| DS3            | PRJNA 470729      | 11 weeks old mouse heart from TAC (n=2) and SHAM (n=4) operated animals.<br>No publication referring to data available.                                                                                                                                                       |
| DS4            | PRJNA 277489      | 3-4 months old mouse cardiac tissue from TAC and SHAM operated animals 1, 2, 4 and 8 weeks after operation (n=4)<br><a href="https://doi.org/10.1371/journal.pcbi.1004332">https://doi.org/10.1371/journal.pcbi.1004332</a>                                                   |
| DS5            | PRJNA 445706      | non-failing human left ventricular tissues (32-65 years old) (n=8)<br><a href="https://doi.org/10.1038/s41598-018-32154-2">https://doi.org/10.1038/s41598-018-32154-2</a>                                                                                                     |
| DS6            | PRJNA 291619      | human left ventricular biopsies from heart transplantation donors (n=4, 57.5 $\pm$ 11.7 years old) and recipients (n=4, 57.5 $\pm$ 10.2 years old) suffering from cardiomyopathy<br><a href="https://doi.org/10.5603/CJ.a2017.0052">https://doi.org/10.5603/CJ.a2017.0052</a> |
| DS7            | PRJNA 280990      | human left ventricular tissues from healthy individuals and myotonic dystrophy patients (n=3)<br><a href="https://doi.org/10.1038/ncomms11067">https://doi.org/10.1038/ncomms11067</a>                                                                                        |
| DS8            | PRJEB 8360        | human left ventricular tissues from dilated cardiomyopathy patients (n=6, samples with deepest sequencing chosen)<br><a href="https://doi.org/10.1371/journal.pone.0097380">https://doi.org/10.1371/journal.pone.0097380</a>                                                  |



**Table S2. Boltzmann fitting results of voltage-dependent activation/inactivation of sodium and L-type calcium currents.**

|                                                   |           | control           | $\alpha 4^+$      | p-value  |
|---------------------------------------------------|-----------|-------------------|-------------------|----------|
| <b>sodium current</b>                             |           |                   |                   |          |
| Activation                                        | $V_{1/2}$ | $-46.5 \pm 1.1$   | $-52.9 \pm 0.9$   | $<0.001$ |
|                                                   | slope     | $2.86 \pm 0.22$   | $1.88 \pm 0.27$   | 0.01     |
| Inactivation                                      | $V_{1/2}$ | $-78.2 \pm 0.8$   | $-79.2 \pm 0.8$   | $>0.05$  |
|                                                   | slope     | $4.68 \pm 0.21$   | $4.92 \pm 0.34$   | $>0.05$  |
| <b>L-type <math>\text{Ca}^{2+}</math> current</b> |           |                   |                   |          |
| Activation                                        | $V_{1/2}$ | $-2.54 \pm 0.48$  | $-7.96 \pm 0.73$  | $<0.001$ |
|                                                   | slope     | $4.70 \pm 0.13$   | $4.02 \pm 0.42$   | $>0.05$  |
| Inactivation                                      | $V_{1/2}$ | $-16.60 \pm 0.59$ | $-20.04 \pm 0.75$ | $<0.001$ |
|                                                   | slope     | $5.11 \pm 0.22$   | $6.04 \pm 0.25$   | $<0.01$  |

**Table S3. Top 20 KEGG pathways GO terms from enrichment analysis of differentially expressed genes in neonatal and 4-week-old  $\alpha 4^+$  ventricles.**

| KEGG pathway                            | Count | P-value | Fold enrichment | FDR     |
|-----------------------------------------|-------|---------|-----------------|---------|
| <b>neonatal</b>                         |       |         |                 |         |
| Bile secretion                          | 8     | 5.0E−06 | 11.1            | 6.0E−03 |
| Neuroactive ligand-receptor interaction | 9     | 9.8E−06 | 8.2             | 1.2E−02 |
| Calcium signaling pathway               | 11    | 1.9E−05 | 5.6             | 2.3E−02 |
| Adrenergic signaling in cardiomyocytes  | 9     | 1.0E−03 | 4.3             | 1.2E+00 |
| Salivary secretion                      | 6     | 1.5E−03 | 6.9             | 1.8E+00 |
| Pancreatic secretion                    | 6     | 2.3E−03 | 6.3             | 2.6E+00 |
| cAMP signaling pathway                  | 9     | 2.8E−03 | 3.6             | 3.3E+00 |
| Proximal tubule bicarbonate reclamation | 4     | 3.6E−03 | 12.4            | 4.2E+00 |
| Gastric acid secretion                  | 5     | 1.0E−02 | 5.7             | 1.2E+01 |
| Insulin secretion                       | 5     | 1.4E−02 | 5.3             | 1.5E+01 |
| cGMP-PKG signaling pathway              | 7     | 2.0E−02 | 3.2             | 2.2E+01 |
| Cardiac muscle contraction              | 5     | 2.7E−02 | 4.3             | 2.8E+01 |
| Circadian entrainment                   | 5     | 2.8E−02 | 4.2             | 2.9E+01 |
| Glutamatergic synapse                   | 5     | 3.6E−02 | 3.9             | 3.5E+01 |
| One carbon pool by folate               | 3     | 3.9E−02 | 9.3             | 3.8E+01 |
| Carbohydrate digestion and absorption   | 3     | 5.8E−02 | 7.5             | 5.1E+01 |
| Protein digestion and absorption        | 4     | 6.0E−02 | 4.4             | 5.2E+01 |
| Vascular smooth muscle contraction      | 5     | 6.5E−02 | 3.2             | 5.5E+01 |
| Mineral absorption                      | 3     | 6.8E−02 | 6.9             | 5.7E+01 |
| Retrograde endocannabinoid signaling    | 4     | 8.0E−02 | 3.9             | 6.3E+01 |
| <b>four weeks</b>                       |       |         |                 |         |
| Neuroactive ligand-receptor interaction | 28    | 1.5E−09 | 3.5             | 2.0E−06 |
| ECM-receptor interaction                | 29    | 1.8E−09 | 3.4             | 2.4E−06 |
| Protein digestion and absorption        | 24    | 1.3E−08 | 3.6             | 1.7E−05 |
| PI3K-Akt signaling pathway              | 67    | 1.7E−08 | 2.0             | 2.3E−05 |
| Calcium signaling pathway               | 32    | 1.6E−05 | 2.2             | 2.1E−02 |
| Malaria                                 | 14    | 7.7E−05 | 3.4             | 1.0E−01 |
| Amoebiasis                              | 23    | 1.1E−04 | 2.4             | 1.5E−01 |
| Focal adhesion                          | 42    | 1.6E−04 | 1.8             | 2.1E−01 |
| Cytokine-cytokine receptor interaction  | 25    | 2.0E−04 | 2.2             | 2.6E−01 |
| Adrenergic signaling in cardiomyocytes  | 30    | 3.9E−04 | 1.9             | 5.1E−01 |
| Circadian entrainment                   | 20    | 4.8E−04 | 2.3             | 6.2E−01 |
| cGMP-PKG signaling pathway              | 29    | 1.6E−03 | 1.8             | 2.1E+00 |
| Dilated cardiomyopathy                  | 19    | 1.7E−03 | 2.2             | 2.1E+00 |
| Arginine and proline metabolism         | 13    | 3.9E−03 | 2.5             | 5.0E+00 |
| Hypertrophic cardiomyopathy (HCM)       | 17    | 6.2E−03 | 2.0             | 7.8E+00 |
| Ovarian steroidogenesis                 | 9     | 7.0E−03 | 2.9             | 8.8E+00 |
| Histidine metabolism                    | 7     | 7.8E−03 | 3.6             | 9.7E+00 |
| Cholinergic synapse                     | 19    | 7.9E−03 | 1.9             | 9.9E+00 |
| Oxytocin signaling pathway              | 26    | 8.3E−03 | 1.7             | 1.0E+01 |
| Morphine addiction                      | 14    | 1.1E−02 | 2.1             | 1.4E+01 |

| Gene ontology term -<br>Biological process                          | Count | P-value | Fold<br>enrichment | FDR     |
|---------------------------------------------------------------------|-------|---------|--------------------|---------|
| <b>neonatal</b>                                                     |       |         |                    |         |
| ion transport                                                       | 19    | 9.7E-07 | 4.0                | 1.6E-03 |
| regulation of ion transmembrane transport                           | 8     | 4.1E-05 | 8.4                | 6.6E-02 |
| transport                                                           | 40    | 7.3E-05 | 1.9                | 1.2E-01 |
| transmembrane transport                                             | 13    | 7.7E-05 | 4.1                | 1.2E-01 |
| regulation of atrial cardiac muscle cell<br>membrane depolarization | 4     | 8.8E-05 | 39.8               | 1.4E-01 |
| calcium ion transmembrane transport                                 | 7     | 1.1E-04 | 9.1                | 1.7E-01 |
| neurotransmitter transport                                          | 5     | 1.2E-04 | 18.6               | 1.9E-01 |
| G-protein coupled receptor signaling pathway                        | 12    | 2.1E-04 | 4.0                | 3.3E-01 |
| potassium ion transport                                             | 7     | 2.4E-04 | 7.9                | 3.8E-01 |
| cardiac conduction                                                  | 4     | 3.5E-04 | 26.5               | 5.7E-01 |
| sensory perception of sound                                         | 7     | 4.3E-04 | 7.1                | 6.8E-01 |
| sodium ion transport                                                | 6     | 1.2E-03 | 7.5                | 1.8E+00 |
| sodium ion transmembrane transport                                  | 4     | 1.4E-03 | 17.0               | 2.3E+00 |
| visual learning                                                     | 5     | 4.7E-03 | 7.3                | 7.2E+00 |
| regulation of membrane potential                                    | 5     | 4.7E-03 | 7.3                | 7.2E+00 |
| locomotion                                                          | 3     | 5.5E-03 | 25.6               | 8.4E+00 |
| one-carbon metabolic process                                        | 4     | 5.5E-03 | 10.8               | 8.5E+00 |
| signal transduction                                                 | 18    | 6.0E-03 | 2.1                | 9.2E+00 |
| adult walking behavior                                              | 4     | 7.1E-03 | 9.9                | 1.1E+01 |
| calcium ion-regulated exocytosis of<br>neurotransmitter             | 3     | 7.2E-03 | 22.4               | 1.1E+01 |
| <b>four weeks</b>                                                   |       |         |                    |         |
| cell adhesion                                                       | 81    | 6.2E-13 | 2.3                | 1.2E-09 |
| regulation of ion transmembrane transport                           | 30    | 3.3E-12 | 4.1                | 6.1E-09 |
| G-protein coupled receptor signaling pathway                        | 58    | 1.6E-11 | 2.5                | 3.0E-08 |
| ion transport                                                       | 72    | 5.0E-09 | 2.0                | 9.4E-06 |
| potassium ion transport                                             | 23    | 1.5E-07 | 3.4                | 2.8E-04 |
| extracellular matrix organization                                   | 28    | 1.2E-06 | 2.7                | 2.2E-03 |
| collagen fibril organization                                        | 16    | 1.4E-06 | 4.1                | 2.6E-03 |
| response to drug                                                    | 56    | 1.5E-06 | 1.9                | 2.9E-03 |
| positive regulation of cell migration                               | 44    | 1.9E-06 | 2.1                | 3.6E-03 |
| signal transduction                                                 | 102   | 5.4E-06 | 1.5                | 1.0E-02 |
| ossification                                                        | 23    | 8.6E-06 | 2.8                | 1.6E-02 |
| sodium ion transport                                                | 19    | 1.1E-05 | 3.1                | 2.1E-02 |
| cell-cell signaling                                                 | 15    | 2.1E-05 | 3.6                | 3.9E-02 |
| inflammatory response                                               | 41    | 2.8E-05 | 2.0                | 5.2E-02 |
| positive regulation of cell proliferation                           | 65    | 3.0E-05 | 1.7                | 5.6E-02 |
| positive regulation of cell-substrate adhesion                      | 14    | 3.1E-05 | 3.7                | 5.9E-02 |
| endodermal cell differentiation                                     | 11    | 3.3E-05 | 4.6                | 6.2E-02 |
| cellular response to interleukin-1                                  | 17    | 5.3E-05 | 3.0                | 1.0E-01 |
| positive regulation of Rho protein signal<br>transduction           | 9     | 9.8E-05 | 5.1                | 1.8E-01 |
| negative regulation of Wnt signaling pathway                        | 16    | 1.2E-04 | 3.0                | 2.2E-01 |

| Gene ontology term -<br>Cellular compartment | Count | P-value | Fold<br>enrichment | FDR     |
|----------------------------------------------|-------|---------|--------------------|---------|
| <b>neonatal</b>                              |       |         |                    |         |
| synapse                                      | 21    | 1.5E-08 | 4.8                | 1.9E-05 |
| integral component of membrane               | 81    | 1.6E-08 | 1.8                | 2.0E-05 |
| plasma membrane                              | 67    | 2.0E-08 | 1.9                | 2.5E-05 |
| integral component of plasma membrane        | 21    | 1.2E-05 | 3.1                | 1.5E-02 |
| membrane                                     | 100   | 1.0E-04 | 1.3                | 1.3E-01 |
| synaptic vesicle membrane                    | 6     | 1.7E-04 | 11.2               | 2.1E-01 |
| extracellular region                         | 24    | 8.7E-04 | 2.1                | 1.1E+00 |
| voltage-gated calcium channel complex        | 4     | 1.4E-03 | 17.1               | 1.8E+00 |
| cell junction                                | 17    | 1.8E-03 | 2.4                | 2.2E+00 |
| anchored component of membrane               | 6     | 4.8E-03 | 5.4                | 5.8E+00 |
| basement membrane                            | 6     | 8.6E-03 | 4.7                | 1.0E+01 |
| dendrite                                     | 12    | 1.0E-02 | 2.4                | 1.2E+01 |
| apical plasma membrane                       | 9     | 1.2E-02 | 2.9                | 1.4E+01 |
| apical dendrite                              | 3     | 1.9E-02 | 13.8               | 2.2E+01 |
| brush border membrane                        | 4     | 2.0E-02 | 6.8                | 2.3E+01 |
| neuronal cell body                           | 12    | 2.6E-02 | 2.1                | 2.8E+01 |
| sarcolemma                                   | 6     | 3.0E-02 | 3.4                | 3.2E+01 |
| extracellular space                          | 18    | 3.4E-02 | 1.7                | 3.6E+01 |
| cytoplasmic vesicle                          | 14    | 3.7E-02 | 1.9                | 3.8E+01 |
| axon terminus                                | 4     | 4.1E-02 | 5.2                | 4.1E+01 |
| <b>four weeks</b>                            |       |         |                    |         |
| extracellular region                         | 259   | 4.1E-68 | 3.0                | 6.0E-65 |
| extracellular space                          | 194   | 2.2E-34 | 2.4                | 3.2E-31 |
| proteinaceous extracellular matrix           | 85    | 1.3E-28 | 3.6                | 2.0E-25 |
| extracellular matrix                         | 77    | 1.1E-16 | 2.7                | 1.7E-13 |
| plasma membrane                              | 368   | 1.3E-13 | 1.4                | 1.9E-10 |
| collagen trimer                              | 29    | 7.2E-13 | 4.5                | 1.1E-09 |
| integral component of plasma membrane        | 102   | 5.5E-12 | 2.0                | 8.1E-09 |
| integral component of membrane               | 441   | 2.3E-09 | 1.3                | 3.4E-06 |
| basement membrane                            | 30    | 1.7E-08 | 3.1                | 2.5E-05 |
| cell surface                                 | 81    | 3.6E-08 | 1.8                | 5.4E-05 |
| neuronal cell body                           | 77    | 3.5E-07 | 1.8                | 5.1E-04 |
| perikaryon                                   | 25    | 3.6E-05 | 2.4                | 5.3E-02 |
| anchored component of membrane               | 22    | 4.2E-05 | 2.6                | 6.1E-02 |
| synapse                                      | 57    | 6.9E-05 | 1.7                | 1.0E-01 |
| blood microparticle                          | 19    | 2.1E-04 | 2.6                | 3.0E-01 |
| axon                                         | 49    | 4.1E-04 | 1.7                | 6.0E-01 |
| asymmetric synapse                           | 7     | 5.6E-04 | 5.5                | 8.3E-01 |
| perinuclear region of cytoplasm              | 95    | 1.6E-03 | 1.4                | 2.3E+00 |
| dendrite                                     | 56    | 2.0E-03 | 1.5                | 2.9E+00 |
| extracellular exosome                        | 285   | 2.8E-03 | 1.2                | 4.0E+00 |

| Gene ontology term -<br>Molecular function                                                            | Count | P-value | Fold<br>enrichment | FDR     |
|-------------------------------------------------------------------------------------------------------|-------|---------|--------------------|---------|
| <b>neonatal</b>                                                                                       |       |         |                    |         |
| G-protein coupled receptor activity                                                                   | 12    | 1.4E-06 | 6.7                | 2.0E-03 |
| voltage-gated ion channel activity                                                                    | 8     | 4.8E-05 | 8.2                | 6.6E-02 |
| ion channel activity                                                                                  | 6     | 3.2E-03 | 5.9                | 4.4E+00 |
| transporter activity                                                                                  | 7     | 3.4E-03 | 4.7                | 4.7E+00 |
| calcium channel activity                                                                              | 5     | 3.8E-03 | 7.7                | 5.2E+00 |
| voltage-gated calcium channel activity                                                                | 4     | 3.9E-03 | 12                 | 5.2E+00 |
| signal transducer activity                                                                            | 10    | 7.5E-03 | 2.9                | 9.9E+00 |
| sodium channel activity                                                                               | 3     | 1.2E-02 | 17                 | 1.5E+01 |
| aldehyde dehydrogenase (NAD) activity                                                                 | 3     | 2.0E-02 | 13                 | 2.4E+01 |
| oxidoreductase activity, acting on the<br>aldehyde or oxo group of donors, NAD or<br>NADP as acceptor | 3     | 3.3E-02 | 10                 | 3.7E+01 |
| low voltage-gated calcium channel activity                                                            | 2     | 3.4E-02 | 58                 | 3.8E+01 |
| voltage-gated calcium channel activity<br>involved SA node cell action potential                      | 2     | 3.4E-02 | 58                 | 3.8E+01 |
| formyltetrahydrofolate dehydrogenase activity                                                         | 2     | 3.4E-02 | 58                 | 3.8E+01 |
| symporter activity                                                                                    | 4     | 3.9E-02 | 5.3                | 4.2E+01 |
| insulin-like growth factor binding                                                                    | 3     | 4.5E-02 | 8.7                | 4.7E+01 |
| PDZ domain binding                                                                                    | 5     | 5.3E-02 | 3.5                | 5.3E+01 |
| calmodulin binding                                                                                    | 6     | 5.4E-02 | 2.9                | 5.4E+01 |
| transmembrane transporter activity                                                                    | 3     | 5.8E-02 | 7.6                | 5.6E+01 |
| hydroxymethyl-, formyl- and related<br>transferase activity                                           | 2     | 6.6E-02 | 29                 | 6.2E+01 |
| 4-trimethylammonibutyraldehyde<br>dehydrogenase activity                                              | 2     | 6.6E-02 | 29                 | 6.2E+01 |
| <b>four weeks</b>                                                                                     |       |         |                    |         |
| G-protein coupled receptor activity                                                                   | 42    | 7.4E-12 | 3.1                | 1.2E-08 |
| voltage-gated ion channel activity                                                                    | 29    | 3.1E-11 | 4.0                | 5.1E-08 |
| calcium ion binding                                                                                   | 85    | 4.4E-10 | 2.0                | 7.3E-07 |
| heparin binding                                                                                       | 34    | 5.2E-09 | 3.0                | 8.6E-06 |
| cytokine activity                                                                                     | 26    | 1.6E-07 | 3.1                | 2.7E-04 |
| scavenger receptor activity                                                                           | 15    | 3.6E-07 | 4.7                | 5.8E-04 |
| extracellular matrix structural constituent                                                           | 15    | 6.8E-07 | 4.5                | 1.1E-03 |
| growth factor activity                                                                                | 26    | 1.2E-06 | 2.8                | 1.9E-03 |
| signal transducer activity                                                                            | 51    | 2.2E-06 | 2.0                | 3.7E-03 |
| fibronectin binding                                                                                   | 14    | 2.9E-06 | 4.3                | 4.7E-03 |
| hormone activity                                                                                      | 15    | 1.0E-05 | 3.8                | 1.6E-02 |
| voltage-gated potassium channel activity                                                              | 12    | 2.8E-05 | 4.2                | 4.6E-02 |
| peptidase inhibitor activity                                                                          | 16    | 9.7E-05 | 3.0                | 1.6E-01 |
| extracellular matrix binding                                                                          | 12    | 1.2E-04 | 3.7                | 2.0E-01 |
| serine-type endopeptidase inhibitor activity                                                          | 14    | 1.7E-04 | 3.2                | 2.8E-01 |
| metalloendopeptidase activity                                                                         | 19    | 2.9E-04 | 2.5                | 4.8E-01 |
| insulin-like growth factor binding                                                                    | 10    | 4.2E-04 | 3.9                | 6.8E-01 |
| sodium channel activity                                                                               | 7     | 5.9E-04 | 5.4                | 9.7E-01 |
| metallopeptidase activity                                                                             | 23    | 8.6E-04 | 2.1                | 1.4E+00 |
| ion channel activity                                                                                  | 18    | 8.9E-04 | 2.4                | 1.5E+00 |

**Table S4. List of REST target genes that were upregulated in  $\alpha 4^+$  ventricles and ranking order of their expression in different mouse tissues. Expression data from ENCODE project RNA sequencing analysis downloaded from NCBI gene database.**

| Rest targets upregulated in neonatal and 4-week-old α4+ ventricles |         |         |                       |               |               |                  |             |              |                |                    |                       |             |              |            |           |             |           |             |            |                     |             |                |                       |              |               |                            |              |              |                   |               |
|--------------------------------------------------------------------|---------|---------|-----------------------|---------------|---------------|------------------|-------------|--------------|----------------|--------------------|-----------------------|-------------|--------------|------------|-----------|-------------|-----------|-------------|------------|---------------------|-------------|----------------|-----------------------|--------------|---------------|----------------------------|--------------|--------------|-------------------|---------------|
| 13                                                                 | 6       | 10      | 23                    | 8             | 24            | 1                | 15          | 4            | 9              | 2                  | 11                    | 3           | 12           | 22         | 21        | 27          | 25        | 27          | 17         | 27                  | 7           | 19             | 20                    | 26           | 27            | 16                         | 14           | 18           | 5                 | A930029G22Rik |
| 8                                                                  | 6       | 4       | 18                    | 7             | 26            | 1                | 20          | 3            | 16             | 2                  | 17                    | 22          | 21           | 24         | 27        | 25          | 23        | 30          | 13         | 10                  | 9           | 28             | 15                    | 11           | 19            | 12                         | 29           | 14           | 5                 | Atp1a3        |
| 9                                                                  | 6       | 4       | 20                    | 11            | 22            | 2                | 19          | 1            | 24             | 3                  | 26                    | 18          | 16           | 29         | 17        | 15          | 12        | 14          | 10         | 28                  | 7           | 30             | 21                    | 27           | 25            | 8                          | 13           | 23           | 5                 | Atp2b2        |
| 20                                                                 | 14      | 10      | 4                     | 30            | 6             | 15               | 5           | 18           | 7              | 17                 | 23                    | 19          | 3            | 21         | 9         | 8           | 2         | 1           | 28         | 27                  | 24          | 22             | 12                    | 26           | 11            | 29                         | 25           | 16           | 13                | Bdh1          |
| 10                                                                 | 4       | 2       | 21                    | 8             | 22            | 3                | 19          | 6            | 17             | 5                  | 11                    | 13          | 18           | 24         | 30        | 28          | 25        | 29          | 12         | 7                   | 14          | 26             | 20                    | 27           | 16            | 9                          | 15           | 23           | 1                 | Fam57b        |
| 14                                                                 | 8       | 6       | 25                    | 1             | 29            | 3                | 9           | 4            | 19             | 5                  | 15                    | 16          | 23           | 20         | 18        | 17          | 12        | 30          | 22         | 11                  | 2           | 28             | 21                    | 26           | 23            | 10                         | 13           | 27           | 7                 | Rims4         |
| 10                                                                 | 6       | 4       | 15                    | 11            | 24            | 3                | 8           | 1            | 20             | 2                  | 22                    | 9           | 19           | 18         | 28        | 25          | 30        | 27          | 12         | 21                  | 7           | 26             | 16                    | 29           | 14            | 17                         | 13           | 23           | 5                 | Syt7          |
| Rest targets upregulated in 4-week-old α4+ ventricles              |         |         |                       |               |               |                  |             |              |                |                    |                       |             |              |            |           |             |           |             |            |                     |             |                |                       |              |               |                            |              |              |                   |               |
| 8                                                                  | 7       | 4       | 22                    | 11            | 15            | 1                | 16          | 2            | 14             | 3                  | 18                    | 9           | 28           | 16         | 10        | 12          | 26        | 30          | 25         | 13                  | 23          | 29             | 24                    | 20           | 19            | 21                         | 5            | 27           | 6                 | Acsl6         |
| 8                                                                  | 6       | 4       | 19                    | 15            | 23            | 1                | 10          | 2            | 13             | 3                  | 18                    | 25          | 24           | 11         | 30        | 29          | 28        | 27          | 22         | 16                  | 7           | 26             | 14                    | 21           | 17            | 12                         | 9            | 20           | 5                 | Cacna1a       |
| 5                                                                  | 4       | 3       | 16                    | 12            | 23            | 1                | 8           | 7            | 19             | 6                  | 18                    | 9           | 25           | 10         | 28        | 27          | 29        | 30          | 22         | 24                  | 13          | 21             | 17                    | 20           | 14            | 26                         | 11           | 15           | 2                 | Cacna2d2      |
| no expression data available                                       |         |         |                       |               |               |                  |             |              |                |                    |                       |             |              |            |           |             |           |             |            |                     |             |                |                       |              |               |                            |              |              | Gm13054           |               |
| 7                                                                  | 4       | 5       | 21                    | 12            | 8             | 6                | 14          | 1            | 18             | 2                  | 17                    | 13          | 23           | 20         | 28        | 27          | 29        | 30          | 9          | 22                  | 11          | 24             | 19                    | 25           | 15            | 16                         | 10           | 26           | 3                 | Gnao1         |
| 24                                                                 | 13      | 8       | 14                    | 5             | 23            | 1                | 4           | 3            | 7              | 2                  | 20                    | 6           | 21           | 26         | 30        | 28          | 29        | 27          | 16         | 17                  | 9           | 15             | 10                    | 22           | 11            | 19                         | 25           | 18           | 12                | Hcn2          |
| 6                                                                  | 3       | 2       | 20                    | 15            | 10            | 4                | 18          | 7            | 25             | 5                  | 8                     | 17          | 21           | 9          | 28        | 26          | 29        | 30          | 16         | 19                  | 11          | 12             | 24                    | 27           | 22            | 14                         | 13           | 23           | 1                 | Map1b         |
| 4                                                                  | 2       | 3       | 21                    | 9             | 11            | 5                | 14          | 8            | 20             | 7                  | 22                    | 24          | 25           | 16         | 29        | 28          | 26        | 30          | 18         | 12                  | 6           | 23             | 19                    | 15           | 17            | 13                         | 27           | 9            | 1                 | Meis3         |
| 6                                                                  | 3       | 2       | 22                    | 11            | 19            | 7                | 17          | 5            | 21             | 4                  | 24                    | 14          | 13           | 10         | 27        | 20          | 28        | 30          | 18         | 16                  | 15          | 23             | 25                    | 29           | 12            | 26                         | 8            | 9            | 1                 | Mgat5b        |
| 3                                                                  | 7       | 6       | 22                    | 16            | 17            | 9                | 30          | 10           | 26             | 5                  | 23                    | 1           | 12           | 14         | 29        | 27          | 25        | 24          | 4          | 19                  | 12          | 15             | 28                    | 20           | 21            | 18                         | 11           | 2            | 8                 | Nppa          |
| 2                                                                  | 6       | 5       | 17                    | 14            | 9             | 8                | 20          | 15           | 20             | 10                 | 20                    | 1           | 16           | 7          | 20        | 20          | 19        | 20          | 11         | 20                  | 20          | 3              | 20                    | 20           | 20            | 18                         | 13           | 4            | 12                | Nppb          |
| 9                                                                  | 7       | 4       | 11                    | 10            | 20            | 3                | 8           | 1            | 13             | 2                  | 14                    | 25          | 19           | 18         | 23        | 24          | 29        | 30          | 15         | 27                  | 22          | 26             | 12                    | 16           | 6             | 28                         | 21           | 17           | 5                 | Ptpn          |
| CNS E11.5                                                          | CNS E14 | CNS E18 | large intestine adult | adrenal adult | bladder adult | cerebellum adult | colon adult | cortex adult | duodenum adult | frontal lobe adult | genital fat pad adult | heart adult | kidney adult | limb E14.5 | liver E14 | liver E14.5 | liver E18 | liver adult | lung adult | mammary gland adult | ovary adult | placenta adult | small intestine adult | spleen adult | stomach adult | subcutaneous fat pad adult | testis adult | thymus adult | whole brain E14.5 | gene          |

**Table S5. Sequences of primers and probes used in gene expression analysis. Genes with probe sequence were analyzed with Taqman based chemistry and genes without probe sequence were analyzed with Sybr Green chemistry.**

| <b>Short name</b>                            | <b>Name, Gene ID</b>                                                              | <b>Nucleotide sequence</b>                                                                                 |
|----------------------------------------------|-----------------------------------------------------------------------------------|------------------------------------------------------------------------------------------------------------|
| 18s                                          | 18S ribosomal RNA<br><br>19791                                                    | 5' TGGTTGCAAAGCTGAACTTAAAG<br>3' AGTCAAATTAAGCCGCAGGC<br>probe CCTGGTGGTGCCCTTCCGTCA                       |
| B2m                                          | beta-2 microglobulin<br><br>12010                                                 | 5' GCCTGTATGCTATCCAGA<br>3' GAAGGACATATCTGACATCTC<br>probe TATACTCACGCCACCCACCG                            |
| Pgc-1 $\alpha$<br>(total<br>Pgc-1 $\alpha$ ) | peroxisome proliferator activated receptor,<br>gamma,coactivator 1 alpha<br>19017 | 5' (V) AGCGACCAATCGGAAATCAT<br>3' (VI) GCAAGTTTGCCTCATTCTCTTCA<br>probe TCCAACCAGTACAACAATGAGCCTGCG        |
| Pgc-1 $\alpha$<br>(exon 1a)                  | peroxisome proliferator activated receptor,<br>gamma,coactivator 1 alpha<br>19017 | 5' (III) CAGAGTGGATTGGAGTTG<br>3' (IV) GGTCAAGTTCAGGAAGATC<br>probe TCACCAACCAGAGCAGCACA                   |
| Pgc-1 $\alpha$<br>(exon 1b +<br>exon 1b')    | peroxisome proliferator activated receptor,<br>gamma,coactivator 1 alpha<br>19017 | 5' (I) AGCAGAATGAGTGACATG<br>3' (IV) GGTCAAGTTCAGGAAGATC<br>probe TCACCAACCAGAGCAGCACA                     |
| Pgc-1 $\alpha$<br>(exon 1b')                 | peroxisome proliferator activated receptor,<br>gamma,coactivator 1 alpha<br>19017 | 5' (II) CACCTCAGACCCACTATG<br>3' (IV) GGTCAAGTTCAGGAAGATC<br>probe TCACCAACCAGAGCAGCACA                    |
| Pgc-1 $\alpha$<br>(exon 7b)                  | peroxisome proliferator activated receptor,<br>gamma,coactivator 1 alpha<br>19017 | 5' (VII) TCACACCAAACCCACAGAAA<br>3' (VIII) GTCAGTGGGAAGATATGGCACAT<br>probe CTGGGGTTCAGAGGAAGAGATAAAGTTGTT |
| Pgc-1 $\alpha$<br>(exon 1a<br>to exon 7b)    | peroxisome proliferator activated receptor,<br>gamma,coactivator 1 alpha<br>19017 | 5' (III) CAGAGTGGATTGGAGTTG<br>3' (VIII) GTCAGTGGGAAGATATGGCACAT                                           |



|                                               |                                                                                   |                                                                                               |
|-----------------------------------------------|-----------------------------------------------------------------------------------|-----------------------------------------------------------------------------------------------|
| Pgc-1 $\alpha$<br>(exon 1b/1b'<br>to exon 7b) | peroxisome proliferator activated receptor,<br>gamma,coactivator 1 alpha<br>19017 | 5' (I) AGCAGAATGAGTGACATG<br>3' (VIII) GTCACTGGAAGATATGGCACAT                                 |
| $\alpha$ -Mhc                                 | myosin, heavy polypeptide 6, cardiac muscle,<br>alpha<br>17888                    | 5' GGTGCCAAGAAGATGCACG<br>3' TTATGTTTATTGTGTATTGGCCACAG<br>probe CGAGGAATAACCTCTCCAGCAGACCCTC |
| $\beta$ -Mhc                                  | myosin, heavy polypeptide 7, cardiac muscle,<br>beta<br>140781                    | 5' AGCTCTAAGGGTGCCCCGTG<br>3' TGCTTCCACCTAAAGGGCTG<br>probe AGCCCTCAGACCTGGAGCCTTTGC          |
| Anp                                           | natriuretic peptide type A<br><br>230899                                          | 5' GAAAAGCAAACCTGAGGGCTCTG<br>3' CCTACCCCCGAAGCAGCT<br>probe TCGCTGGCCCTCGGAGCCT              |
| Bnp                                           | natriuretic peptide type B<br><br>18158                                           | 5' AGGCGAGACAAGGGAGAACA<br>3' GGAGATCCATGCCGCAGA<br>probe CATCATTGCCTGGCCCATCGC               |
| Tfam                                          | transcription factor A, mitochondrial<br><br>21780                                | 5' TTCGTTACGACAATGAAATGAAGTC<br>3' TCGACGGATGAGATCACTTCG<br>probe TGGGAAGAGCAGATGGCTGAAGTTGG  |
| Cpt1b                                         | carnitine palmitoyltransferase 1b, muscle<br><br>12895                            | 5' GACAGAAGCAAACCTGAG<br>3' GTCACAGTGAACCTGGAAA<br>probe CTAAGCCTGGTGTGCTTCC                  |
| Sod2                                          | superoxide dismutase 2, mitochondrial<br><br>20656                                | 5' GAGATGTTACAACCTCAGG<br>3' GCTTCTCCTTAACTTCTC<br>probe TGATAGCCTCCAGCAACTCTCC               |
| Ucp3                                          | uncoupling protein 3 (mitochondrial,<br>proton carrier)<br>22229                  | 5' TTGCCTCCATTCTGAATTG<br>3' GCGTATCATGGCTTGAAA<br>probe CCTCTACGACTCTGTCAAGCAGTT             |

|         |                                                                                      |                                                                                       |
|---------|--------------------------------------------------------------------------------------|---------------------------------------------------------------------------------------|
| Ppara   | peroxisome proliferator activated receptor<br>alpha<br>19031                         | 5' ACGATGCTGTCCTCCTTGATG<br>3' GTGTGATAAAGCCATTGCCGT<br>probe ACAAAGACGGGATGCTGATCGCG |
| Ppary   | peroxisome proliferator activated receptor<br>gamma<br>19016                         | 5' AGTGGAGACCGCCCAGG<br>3' GCAGCAGGTTGTCTTGGATGT<br>probe TTGCTGAACGTGAAGCCCATCGAG    |
| Abat    | 4-aminobutyrate aminotransferase<br><br>268860                                       | 5' CCTCTTCATACCTGGATC<br>3' CCTCTGCTCTCTTCATAG                                        |
| Acads   | acyl-Coenzyme A dehydrogenase, short chain<br><br>11409                              | 5' GGACCCATTCTGAAGTTTG<br>3' AGGAGTTGGTGATCCAAG                                       |
| Aldh5a1 | aldehyde dehydrogenase family 5,<br>subfamily A1<br>214579                           | 5' GGTACGACTTAATGATACAA<br>3' TTGGCAGAGGTATAGATG                                      |
| Atp1b1  | ATPase, Na <sup>+</sup> /K <sup>+</sup> transporting,<br>beta 1 polypeptide<br>11931 | 5' CCAAGTAATGCTGCTAAC<br>3' CTCAGTCTTCTGGATCTG                                        |
| Cacna1h | calcium channel, voltage-dependent,<br>T type, alpha 1H subunit<br>58226             | 5' CTCCGACTGGTTTGTAAC<br>3' CACTCAACATCCTCACAG                                        |
| Ckmt2   | creatine kinase, mitochondrial 2<br><br>76722                                        | 5' GCATCCAAGATTACTCAC<br>3' CTCAGACAGCTTGTAGTA                                        |
| Cox6a2  | cytochrome c oxidase subunit 6A2<br><br>12862                                        | 5' GCCTCTAAAGGTCCTGAG<br>3' TGGTGATACGGGATGAAC                                        |

|        |                                                    |                                                 |
|--------|----------------------------------------------------|-------------------------------------------------|
| Cox7a1 | cytochrome c oxidase subunit 7A1<br>12865          | 5' CTGAGGACGCAAAATGAG<br>3' CGTCATGGTCAGTCTGTA  |
| Cox8b  | cytochrome c oxidase subunit 8B<br>12869           | 5' CGAAGTTCACAGTGGTTC<br>3' ACGACTATGGCTGAGATC  |
| Dgat1  | diacylglycerol O-acyltransferase 1<br>13350        | 5' GATGCTGATCCTGAGTAA<br>3' GTCCTTCAGAAACAGAGA  |
| Epas1  | endothelial PAS domain protein 1<br>13819          | 5' CAGTCTGCTCTGAAAATG<br>3' CAAGGATGAGTGAAGTCA  |
| Fblim1 | filamin binding LIM protein 1<br>74202             | 5' GACCAATGCCTCACTCTC<br>3' CGACTTCCCTGGTAAGAC  |
| Fndc5  | fibronectin type III domain containing 5<br>384061 | 5' GGATGAAGTGGTCATTGG<br>3' TCACCTCCTGAATGAACC  |
| Glrx   | glutaredoxin<br>93692                              | 5' GGTCTTCTGGAGTTTGTG<br>3' GTCTGTTGCATGGAGATTA |
| Gpr162 | G protein-coupled receptor 162<br>14788            | 5' GTGGTGAGCTTCTTCTCC<br>3' CTCACAGGACCAGATGAA  |
| Mpc2   | mitochondrial pyruvate carrier 2<br>70456          | 5' GCTGCCAAAGAAATTGAG<br>3' CTGTGCTGAGTTTCTCTG  |

|          |                                                                 |                                                   |
|----------|-----------------------------------------------------------------|---------------------------------------------------|
| Mtfp1    | mitochondrial fission process 1<br>67900                        | 5' TGGTGTGGTTGAGCTATG<br>3' AGACGGTTGATGGTGAAG    |
| Ndufa6   | NADH:ubiquinone oxidoreductase subunit A6<br>67130              | 5' GGTGAAGCCCATTTCAG<br>3' GTGACATGGGCATTCTTC     |
| Pcyt2    | phosphate cytidyltransferase 2,<br>ethanolamine<br>68671        | 5' CTGTGACTTCTGTGTTCA<br>3' CTGCTTCACTTCCTCATA    |
| Phyh     | phytanoyl-CoA hydroxylase<br>16922                              | 5' CCTGAACAATTCCAGTATA<br>3' GCAGATTCTTTCAAACCTC  |
| S100a1   | S100 calcium binding protein A1<br>20193                        | 5' GAGCAAGAAAGAACTGAA<br>3' CCAGAAGAAGTTGTTACAA   |
| Shmt1    | serine hydroxymethyltransferase 1<br>20425                      | 5' GGAACCTTTTCACAAAATC<br>3' CGACAACATCTTCTCATG   |
| Slc4a3   | solute carrier family 4 (anion exchanger),<br>member 3<br>20536 | 5' CACTGACTATCACGAATTAGG<br>3' GGGAATCACAATGCTACC |
| Slc25a39 | solute carrier family 25, member 39<br>68066                    | 5' GAGTCTCTCCTACACCAA<br>3' GCACAATCTTCACAAAGG    |
| Slc12a7  | solute carrier family 12, member 7<br>20499                     | 5' CCAACTATACCAACCTGA<br>3' GAGGAAGGACTCCATAAC    |

|                   |                                                                                        |                                                                                    |
|-------------------|----------------------------------------------------------------------------------------|------------------------------------------------------------------------------------|
| Atp1a1            | ATPase, Na <sup>+</sup> /K <sup>+</sup> transporting,<br>alpha 1 polypeptide<br>11928  | 5' TGCTCTCTTCTCTTTCTAGTC<br>3' GTCACCATGCTCCGATAC<br>probe CAGGCTCATACTTGTCTCGTCCA |
| Atp1a2            | ATPase, Na <sup>+</sup> /K <sup>+</sup> transporting,<br>alpha 2 polypeptide<br>98660  | 5' CGAACCATCCAACGATAA<br>3' CACCATGTTCTTGAAGGA<br>probe TAGCGGCTGTAGTTATCGTCACC    |
| Atp1a3            | ATPase, Na <sup>+</sup> /K <sup>+</sup> transporting,<br>alpha 3 polypeptide<br>232975 | 5' CTGGATGACCTCAAGAAG<br>3' CACGCAGTCAGTATTGTA<br>probe ACCTCTTCTACTGACATCTTGTGCTC |
| A930029<br>G22Rik | RIKEN cDNA A930029G22 gene<br><br>654806                                               | 5' GGGAAGCCAGACAGAAAG<br>3' TTGCCAGAAGCACAGAAA                                     |
| Atp2b2            | ATPase, Ca <sup>++</sup> transporting,<br>plasma membrane 2<br>11941                   | 5' TCGCCTGTTGAAGGTTTA<br>3' GGTGGTAGAAGGACAGTC<br>probe CAGGCACTGCTCCAGACTTG       |
| Bdh1              | 3-hydroxybutyrate dehydrogenase, type 1<br><br>71911                                   | 5' AAGGCTTCCTTGTATTTG<br>3' CCTTCTCAGGATCTTTCA<br>probe ATCGTCTCCACCGCCTTCTC       |
| Fam57b            | family with sequence similarity 57 member B<br><br>68952                               | 5' CTACCTGCACAAGGAGTTC<br>3' GCAGCCTAGAAAGAAATCTC<br>probe TTGTCGCCACACCACTGAGA    |
| Rims4             | regulating synaptic membrane exocytosis 4<br><br>241770                                | 5' GCATGAACTCCTTCGATG<br>3' GTCTCTGTGCTTCTCTGG                                     |
| Syt7              | synaptotagmin VII<br><br>54525                                                         | 5' CCACACGATGAGTCTGAC<br>3' GTAGCCAACACTGAACTG<br>probe CTCTGTCTCGGACCTCGTCAAC     |

|         |                                                                                   |                                                                                    |
|---------|-----------------------------------------------------------------------------------|------------------------------------------------------------------------------------|
| Cacna1a | calcium channel, voltage-dependent,<br>P/Q type, alpha 1A subunit<br>12286        | 5' GGAACCATACTTCATTGGAA<br>3' TGTCCGTAGGTCAAACCTC                                  |
| Hcn2    | hyperpolarization-activated,<br>cyclic nucleotide-gated K <sup>+</sup> 2<br>15166 | 5' CTGATCAGCATGATGCTACTGCT<br>3' GCATGGGCACCAGGAACT<br>probe TGCCACTGGGACGGTTGCCTG |
| Meis3   | Meis homeobox 3<br><br>17537                                                      | 5' GGATCTTTCCCAAAGTGG<br>3' TGCGATTAGACTGGTCAA                                     |
| Mgat5b  | mannoside acetylglucosaminyltransferase 5,<br>isoenzyme B<br>268510               | 5' CTGGGAGAGATGGTACAG<br>3' CGTGATAGTCCGTGTAGA                                     |
| Ptpn    | protein tyrosine phosphatase, receptor type, N<br><br>19275                       | 5' CCTCTTACAAGTCACTTCC<br>3' CTGGGTAAGGTCATCATG                                    |
| Cdkn1a  | cyclin-dependent kinase inhibitor 1A (P21)<br><br>12575                           | 5' CCAGCCTGACAGATTTCTA<br>3' CACAGAGTGAGGGCTAAG<br>probe CCTCCTGACCCACAGCAGAA      |

**Table S6. Sequences of primers used in luciferase plasmid cloning.**

| <b>Cloned site</b> | <b>Nucleotide sequence</b> |                                  |
|--------------------|----------------------------|----------------------------------|
| Fam57b promoter    | forward                    | AATACGCGTTTCTGAGGACCAGACGAGGT    |
|                    | reverse                    | AAACTCGAGCCAGGTCCACAGCTACACAG    |
| Syt7 promoter      | forward                    | AATACGCGTGGAAAATCTGGGGTGGATCT    |
|                    | reverse                    | AAACTCGAGATGGTCCCCTTCGTCGCC      |
| Fam57b RE1 site    | forward                    | AATGTCGACATCGCTCCTACTCTGTTCTATC  |
|                    | reverse                    | AAAGTCGACGTTCTAGGCACTTAACACACTCA |
| Syt7 RE1 site      | forward                    | AATGTCGACTGTATTGGCGGAGAGACTTGT   |
|                    | reverse                    | AAAGTCGACGGAAAGAGGTAGTTAGAGAGGGA |



## Supplementary methods

### *Cardiomyocyte isolation and culture*

Adult mouse ventricular myocytes at the age of four or 18 weeks were obtained by enzymatic dissociation as previously described[1] (AfCS Procedure Protocol PP00000125). Ten minutes after heparin injection mice were sacrificed by cervical dislocation and the heart was removed. The aorta was cannulated and the heart was placed in a Langendorff apparatus for retrograde perfusion (37°C, 3 mL/min) in adult cardiomyocyte buffer (113 mM NaCl, 4.7 mM KCl, 0.6 mM KH<sub>2</sub>PO<sub>4</sub>, 0.6 mM NaH<sub>2</sub>PO<sub>4</sub>, 1.2 mM MgCl<sub>2</sub>, 32 µM Phenol red, 20.5 mM NaHCO<sub>3</sub>, 10 mM KHCO<sub>3</sub>, 10 mM HEPES, 30 mM taurine, 5.5 mM glucose and 10 mM butanedione monoxime (BDM)). The buffer was supplemented with 140 µg/mL porcine trypsin (Sigma-Aldrich, St Louis, MO, USA), 25 µg/mL liberase (Roche Applied Science, Mannheim, Germany) and 12.5 µM CaCl<sub>2</sub> to break down the extracellular matrix. After removing the heart from perfusion, the ventricles were cut into small pieces and single cells were gently dissociated by pipetting the tissue pieces with a glass Pasteur pipette in the enzyme solution. Inactivation of the enzymes was achieved by addition of 5 % fetal bovine serum (FBS, Gibco, ThermoFisher Scientific, Waltham, MA, USA), after which the suspension was centrifuged (100 g, 1 min) and the cell pellet suspended into adult cardiomyocyte buffer supplemented with 10 % FBS and 12.5 µM CaCl<sub>2</sub>. The Ca<sup>2+</sup> concentration was then gradually increased to 1 mM. Isolated cardiomyocytes were plated on glass coverslips or cell culture dishes coated with mouse laminin (Sigma-Aldrich, St Louis, MO, USA). For metabolic analysis, cells were plated on XF24 Cell Culture Microplates (Agilent Technologies, Santa Clara, CA, USA) coated with matrigel (BD Matrigel matrix, growth factor reduced, BD Biosciences, Franklin Lakes, NJ, USA) diluted 1:1 in XF Assay medium (Agilent Technologies, Santa Clara, CA, USA) (pH 7.4). For calcium imaging and electrophysiological recordings cells were plated in adult cardiomyocyte buffer supplemented with 10 % FBS and 1 mM CaCl<sub>2</sub>, incubated at 37 °C in 5 % CO<sub>2</sub> and used within four hours after isolation. For 24-hour adenoviral transduction, cells were plated in adult cardiomyocyte plating medium (M199 medium (Gibco, ThermoFisher Scientific, Waltham, MA, USA) supplemented with 5 % FBS, 10 mM BDM and 1 % penicillin-streptomycin (PS, Gibco, ThermoFisher Scientific, Waltham, MA, USA)), and three hours later the solution was changed to adult cardiomyocyte culture medium (M199 medium supplemented with 2 mg/mL BSA (Sigma-Aldrich, St Louis, MO, USA), 2 mM L-carnitine (Sigma-Aldrich, St Louis, MO, USA), 5 mM creatine (Sigma-Aldrich, St Louis, MO, USA), 5 mM taurine (Sigma-Aldrich, St Louis, MO, USA), 1.3 mM L-glutamine (Gibco, ThermoFisher Scientific, Waltham, MA, USA), 0.1 µM insulin (Sigma-Aldrich, St Louis, MO, USA), 0.1 nM triiodothyronine (Sigma-Aldrich, St Louis, MO, USA), 2.5 mM pyruvate (Gibco, ThermoFisher Scientific, Waltham, MA, USA) and 1 % PS). For metabolic analysis, cells were suspended into XF Assay medium and incubated at 37 °C in an atmospheric incubator for one hour before the assay.

Neonatal ventricular cardiomyocytes were isolated 1-2 days after birth as previously[1]. The animal was sacrificed by decapitation, the heart was removed, and the ventricles were cut into small pieces. Ventricle pieces were incubated for 1.5 hours in neonatal cardiomyocyte buffer (100 mM NaCl, 1.2 mM KH<sub>2</sub>PO<sub>4</sub>, 4 mM MgSO<sub>4</sub>•6H<sub>2</sub>O, 10 mM HEPES, 50 mM taurine, 20 mM glucose and 10 mM KCl, pH 6.9) supplemented with 2 mg/mL collagenase type II (Worthington, Lakewood, NJ, USA), 2 mg/mL pancreatine (Sigma-Aldrich, St Louis, MO, USA) and 1 % PS. The solution with tissue pieces was pipetted with a plastic pipette and dissociated cells were centrifuged for 5 minutes at 200 g. The supernatant was discarded, and the cells plated on dishes coated with 1.25 µg/mL fibronectin in 0.02 % gelatin solution in neonatal cardiomyocyte culture medium (Dulbecco's Modified Eagle Medium plus GlutaMAX I (Gibco, ThermoFisher Scientific, Waltham, MA, USA) supplemented with 10 % FBS and 1 % PS).

### *Confocal calcium imaging*

Cardiomyocytes were loaded with Fluo-4-acetoxymethyl-ester (10 µM; 0.02% pluronic acid, Invitrogen, ThermoFisher Scientific, Waltham, MA, USA) in DMEM in a humidified incubator at 37 °C in 5 % CO<sub>2</sub> for 20 minutes. Cells were then placed in a recording chamber (Cell MicroControls, Norfolk, VA, USA, flow rate 1-2 mL/min, chamber volume 0.4 mL), where they were continuously perfused with DMEM that was oxygenated with carbogen gas. Measurements were carried out after an incubation period of 20 min to allow de-esterification of the dye. All experiments were carried out at 37 °C sustained by a temperature controller (TC2BIP, Cell MicroControls, Norfolk, VA, USA). Only quiescent, rod-shaped cells showing clear cross-striations were used for recordings. Measurements were performed with a FluoView 1000 confocal inverted microscope (Olympus,

Tokyo, Japan) as previously[1]. Cells were excited at 488 nm and the emitted light was collected at 500-600 nm through a 40X or 60X objective lens in line-scan mode. For cardiomyocyte excitation, myocytes were stimulated with voltage pulses (1 ms) 50% over the excitation threshold through two platinum wires located on both sides of the chamber. To assess sarcoplasmic reticulum calcium content, 10 mM caffeine (Sigma-Aldrich, St Louis, MO, USA) was applied directly to the studied area with a local perfusion manifold (Cell MicroControls, Norfolk, VA, USA). FluoView software was used for image analysis. Fluo-4 fluorescence intensity is measured as  $F/F_0$  - ratio, where  $F$  is the background subtracted fluorescence intensity and  $F_0$  is the background-subtracted minimum fluorescence value measured from each cell at rest. Fluorescence line-scan images were used to measure cardiomyocyte shortening in adult cardiomyocytes. To reveal the movement of myocyte edges, fluorescence images were processed to remove all fluorescence except background.

#### *Patch-clamp recordings*

Coverslips with attached cells were transferred to the recording chamber where they were perfused with DMEM or Tyrode solution (146 mM, NaCl, 4.5 mM KCl, 1.1 mM  $\text{CaCl}_2$ , 1 mM  $\text{MgCl}_2$ , 10 mM HEPES, 10 mM glucose, pH 7.4 adjusted with NaOH). All HEPES-buffered solutions were continuously bubbled with 100% oxygen. Carbogen gas was used for DMEM. An Axopatch 200B patch-clamp amplifier in combination with a Digidata 1440A and Clampex 10 software (Molecular Devices Inc., Sunnyvale, CA, USA) were used for the whole cell currents and action potential (AP) recordings as previously[1]. Ag/AgCl electrodes (World Precision Instruments Inc., Sarasota, FL, USA) were used for recording and bath electrodes. Patch pipettes were pulled from borosilicate glass capillary tubing (1.5 mm OD, 0.86 mm ID, Harvard Apparatus, Edenbridge, UK) with a micropipette puller (Sutter P-97, Sutter Instrument Company, Novato, CA, USA) and fire-polished. Patch electrode resistances were 1.5-3 M $\Omega$  when filled with any pipette solution. The junction potential was corrected by setting the baseline of the test potential as zero before breaking the cell membrane. After establishment of a ruptured patch, the Tyrode solution was changed to the recording solution depending on the current in question. Recordings were carried out after a period of 5 min to allow adequate intracellular dialysis. The cell capacitance and series resistance were compensated electronically, monitored throughout the experiments, and corrected for time-dependent changes. Recordings with an unstable or poor access resistance (10% change over the period of recording or initial access resistance larger than 10 M $\Omega$ ) were discarded. Typically, the access resistance was 3-6 M $\Omega$ . In voltage-clamp, control cells were held at -80 mV (excluding Na/K pump current, see below) and membrane capacitance and membrane resistance were calculated in response to a 5 mV pulse using the Membrane Test function of Clampex. To correct for variability in cell size, current amplitudes were normalized by cell capacitance. Recordings were carried out at a sampling rate of 10 kHz, low-pass Bessel filtered at 5 kHz and stored on a computer and analyzed off-line with pClamp 10 software (Molecular Devices Inc., Sunnyvale, CA, USA).

#### *Action potential recordings.*

APs were elicited by a 1-ms current injection and measured using current clamp mode. The intracellular solution used was the same as described previously[2] (in mM): 120 K-aspartate, 25 KCl, 1  $\text{MgCl}_2$ , 2  $\text{Na}_2$ -phosphocreatine, 4  $\text{Na}_2$ -ATP, 2 NaGTP, 10 EGTA and 5 HEPES, pH 7.2 adjusted with KOH and the bath solution was DMEM.

#### *Sodium current recordings.*

The solutions and protocol for the  $I_{\text{Na}}$  recordings were as described previously[3]. The recordings were carried out at 20 °C (TC2BIP, Cell MicroControls, Norfolk, VA, USA). The internal solution contained (in mM): 5 NaCl, 135 CsF, 10 EGTA, 5  $\text{Mg-ATP}$ , 5 HEPES, pH 7.2 with CsOH and the bath solution contained: 20 NaCl, 117.5 CsCl, 1  $\text{CaCl}_2$ , 1  $\text{MgCl}_2$ , 0.1  $\text{CdCl}_2$ , 11 glucose, 20 HEPES, pH 7.4 with CsOH. Series resistance was compensated down to 1 M $\Omega$ . To characterise the voltage-dependence of the peak current, cells were held at -120 mV and voltage steps were applied from -80 to +40 mV in 5 mV increments with 4-sec inter-sweep intervals. The voltage-dependence of inactivation was assessed by application of 500 ms prepulses of different voltage amplitudes (in the range from -110 mV to -40 mV), which were followed by 30 ms test pulse to -40 mV. A standard two-pulse protocol was studied to evaluate recovery rate from inactivation. Two 20 ms pulses to -40 mV separated by different time increments from 1 to 90 ms were applied.

#### *L-type calcium current recordings.*

A previously described protocol was used[4]. Shortly, L-type  $\text{Ca}^{2+}$  currents were measured using 200-ms voltage steps ranging from  $-30$  to  $+50$  mV in 10 mV increments at a frequency of 0.2 Hz after an initial 1-sec pre-pulse at  $-40$  mV. The voltage dependence of inactivation was assessed by application of 2-sec pre-pulses of different voltage amplitudes (in range from  $-40$  mV to  $+10$  mV), which were followed by a 100-ms test pulse to  $+10$  mV. The internal solution was (in mM): 110 CsOH, 90 aspartic acid, 20 CsCl, 10 tetraethyl ammonium chloride (TEA-Cl), 10 HEPES, 10 EGTA, 5 Mg-ATP<sub>2</sub>, 5 Na<sub>2</sub>-creatine phosphate, 0.4 GTP-Tris, 0.1 leupeptin, pH 7.2 adjusted with CsOH and bath solution was: 125 N-methyl-glucamine, 5 4-aminopyridine, 20 TEA-Cl, 2  $\text{CaCl}_2$ , 2  $\text{MgCl}_2$ , 10 glucose, 10 HEPES, pH 7.4 adjusted with HCl.

#### *Sodium/potassium pump current recordings.*

A previously described protocol was used[5]. Recording pipettes were filled with intracellular solution (in mM): 50 sodium aspartic acid, 20 potassium aspartic acid, 30 CsOH, 20 TEA-Cl, 5  $\text{MgSO}_4$ , 5 HEPES, 11 EGTA, 10 glucose, 5 Na<sub>2</sub>-ATP, 1  $\text{CaCl}_2$ , pH adjusted to 7.2 with CsOH and the free  $[\text{Ca}^{2+}]_i$  was  $1.5 \cdot 10^{-8}$  M. The ventricular myocytes were clamped at 0 mV, the saturating voltage for the Na/K pump, which could increase the signal-to-noise ratio and provide better resolution. To examine the ouabain dose-response, ouabain (10  $\mu\text{M}$  and 1 mM) was applied locally, which resulted in an inward shift of the membrane current in whole cell mode.

## References

1. Mutikainen, M.; Tuomainen, T.; Naumenko, N.; Huusko, J.; Smirin, B.; Laidinen, S.; Kokki, K.; Hynynen, H.; Yla-Herttuala, S.; Heinaniemi, M., *et al.* Peroxisome proliferator-activated receptor-gamma coactivator 1 alpha1 induces a cardiac excitation-contraction coupling phenotype without metabolic remodelling. *The Journal of physiology* **2016**, 594, 7049-7071.
2. Yang, Z.; Shen, W.; Rottman, J.N.; Wikswo, J.P.; Murray, K.T. Rapid stimulation causes electrical remodeling in cultured atrial myocytes. *Journal of molecular and cellular cardiology* **2005**, 38, 299-308.
3. Naumenko, N.; Huusko, J.; Tuomainen, T.; Koivumaki, J.T.; Merentie, M.; Gurzeler, E.; Alitalo, K.; Kivela, R.; Yla-Herttuala, S.; Tavi, P. Vascular endothelial growth factor-b induces a distinct electrophysiological phenotype in mouse heart. *Front Physiol* **2017**, 8, 373.
4. Xu, L.; Li, X.Y.; Liu, Y.; Li, H.T.; Chen, J.; Li, X.Y.; Jiang, X.J.; Wu, G.; Tang, Y.H.; Wang, X., *et al.* The mechanisms underlying ica heterogeneity across murine left ventricle. *Molecular and cellular biochemistry* **2011**, 352, 239-246.
5. Guo, H.C.; Guo, F.; Zhang, L.N.; Zhang, R.; Chen, Q.; Li, J.X.; Yin, J.; Wang, Y.L. Enhancement of na/k pump activity by chronic intermittent hypobaric hypoxia protected against reperfusion injury. *American journal of physiology. Heart and circulatory physiology* **2011**, 300, H2280-2287.
